# Supplementary material for: Rutin protects against aging-related metabolic dysfunction
Source: Royal Society of Chemistry journal article supplement (doi:10.1039/c5fo01036e), 2016-01-01
Supplement: c5fo01036e1.pdf [file c5fo01036e1.pdf]

**Supplemental Table. 1 composition of experimental diet**

| Macronutrient      | Mass (%) | Energy (%)    |
|--------------------|----------|---------------|
| Protein            | 22       | 22.9          |
| Carbohydrate       | 63       | 65.4          |
| Fat                | 5        | 11.7          |
| Ingredient         | Mass (g) | Energy (kcal) |
| Casein             | 220      | 880           |
| Corn oil           | 50       | 450           |
| Cornstarch         | 430      | 1720          |
| Sucrose            | 200      | 800           |
| Cellulose          | 50       |               |
| Mineral mix        | 35       |               |
| Vitamin mix        | 10       |               |
| Methionine         | 3        |               |
| Choline bitartrate | 2        |               |
| Total              | 1000     | 3850          |
